# Supplementary material
Source: MDPI journal article supplement (https://www.mdpi.com/2073-445X/10/8/808)
Supplement: s1 [file s1]

| Variable                                                    | Permanent flower strips |             | Flower strips |             | Conversion into grassland |             | Extensvie arable land use |             | Greening |             | Fallow land |             | Extensification of grassland |             | Reduced tillage |             |
|-------------------------------------------------------------|-------------------------|-------------|---------------|-------------|---------------------------|-------------|---------------------------|-------------|----------|-------------|-------------|-------------|------------------------------|-------------|-----------------|-------------|
| Landscape level                                             | Nature                  | Agriculture | Nature        | Agriculture | Nature                    | Agriculture | Nature                    | Agriculture | Nature   | Agriculture | Nature      | Agriculture | Nature                       | Agriculture | Nature          | Agriculture |
| Share of grassland (> 50%) (3 cuts per year are assumed)    | 1                       | -1          | -1            | -1          | 0                         | -2          | 1                         | 0           | -1       | -1          | 1           | -2          | 1                            | 0           | 0               | 0           |
| Share of specialty crops on arable land (>= 5%)             | 1                       | -1          | 0             | -1          | 0                         | -2          | 1                         | -1          | -1       | -1          | 1           | -2          | 1                            | 0           | 0               | 1           |
| Share of cereals in the crop rotation (> 60%)               | 1                       | 1           | -1            | 1           | 0                         | -1          | 1                         | 1           | -1       | 1           | 1           | -1          | 1                            | 0           | 0               | 1           |
| Share of root crops in the crop rotation (> 10%)            | 1                       | 0           | -1            | -1          | 0                         | -1          | 1                         | -1          | -1       | 1           | 1           | -1          | 1                            | 0           | 0               | -1          |
| Share of cattle (> 1 GV/ ha grassland +forage crops)        | 0                       | -1          | -1            | -1          | 0                         | 0           | 1                         | -1          | -1       | 0           | 1           | 1           | 1                            | -1          | 0               | 0           |
| Share of dairy cows (> 0,5 GV/ ha grassland + forage crops) | 0                       | -1          | -1            | -1          | 0                         | -1          | 1                         | -1          | -1       | 0           | 1           | -1          | 1                            | -1          | 0               | 0           |
| Share of AEMs on arable land (> 10%)                        | 1                       | -1          | -1            | -1          | 0                         | -1          | 1                         | -1          | -1       | 1           | 1           | -1          | 1                            | 0           | 0               | 0           |
| Share of AEMs on grassland (> 20%)                          | 1                       | -1          | -1            | -1          | 1                         | 1           | 1                         | -1          | -1       | 0           | 1           | 0           | 1                            | 0           | 0               | 0           |
| Share of organic farming on arable land (> 10%)             | 1                       | -1          | -1            | -1          | 0                         | -1          | 1                         | -1          | -1       | 1           | 1           | -1          | 1                            | 0           | 0               | -1          |
| Share of organic farming on grassland (> 10%)               | 1                       | -1          | -1            | -1          | 1                         | -1          | 1                         | -1          | -1       | 0           | 1           | -1          | 1                            | 0           | 0               | 0           |
| Share of arable land in nature conservation areas (> 0,5%)  | 1                       | 1           | -1            | -1          | 1                         | 1           | 1                         | 1           | -1       | 1           | 1           | 1           | 1                            | 1           | 0               | -1          |
| Share of grassland in nature conservation areas (> 2%)      | 1                       | 0           | -2            | -1          | 1                         | 0           | 1                         | 0           | -2       | 0           | 1           | 1           | 1                            | 1           | 0               | 0           |
| Share of arable land in Special Protection Areas (> 10%)    | 1                       | 0           | -2            | 0           | 1                         | 0           | 1                         | 0           | -2       | 0           | 1           | 0           | 1                            | 0           | 0               | 0           |
| Share of grassland in Special Protection Areas (> 20%)      | 1                       | 0           | -2            | 0           | 1                         | 0           | 1                         | 0           | -2       | 0           | 1           | 0           | 1                            | 0           | 0               | 0           |
| Share of arable land in FFH** areas (> 2%)                  | 1                       | 0           | -2            | 0           | 1                         | 0           | 1                         | 0           | -2       | 0           | 1           | 0           | 1                            | 0           | 0               | 0           |
| Share of grassland in FFH areas (> 10%)                     | 1                       | 0           | -2            | 0           | 1                         | 0           | 1                         | 0           | -2       | 0           | 1           | 0           | 1                            | 0           | 0               | 0           |
| Share of arable land in landscape protection areas (> 25%)  | 1                       | 0           | -2            | -1          | 1                         | 0           | 1                         | 0           | -2       | 0           | 1           | 0           | 1                            | 0           | 0               | 0           |
| Share of grassland in landscape protection areas (> 40%)    | 1                       | 0           | -2            | 0           | 1                         | 0           | 1                         | 0           | -2       | 0           | 1           | 0           | 1                            | 0           | 0               | 0           |
| Share of grassland in legally protected biotopes (> 0,5%)   | 1                       | 0           | -2            | 0           | 1                         | 0           | 1                         | 0           | -2       | 0           | 0           | 0           | 1                            | 0           | 0               | 0           |
| Field level                                                 |                         |             |               |             |                           |             |                           |             |          |             |             |             |                              |             |                 |             |
| Forest (<= 20 m distance)                                   | -1                      | 1           | -1            | 1           | 1                         | 1           | 1                         | 1           | -1       | 1           | 1           | 1           | 1                            | 1           | 0               | 1           |
| Water bodies (<= 20 m distance)                             | -1                      | 1           | -1            | 1           | 1                         | 1           | 1                         | 1           | -1       | 1           | 1           | 1           | 1                            | 1           | 1               | -1          |
| Biotopes (<= 20 m distance)                                 | 1                       | 1           | -1            | 1           | 1                         | 1           | 1                         | 1           | -1       | 1           | 1           | 1           | 1                            | 1           | 0               | -1          |
| Woody structures (<= 20 m distance)                         | 1                       | 1           | -1            | 1           | 1                         | 1           | 1                         | 1           | -1       | 1           | 1           | 1           | 1                            | 1           | 0               | 0           |
| Wetland areas (<= 20 m distance)                            | 1                       | 1           | -1            | 1           | 1                         | 1           | 1                         | 1           | -1       | 1           | 1           | 1           | 1                            | 1           | 0               | -1          |
| Dry areas (<= 20 m distance)                                | 1                       | 1           | -1            | 1           | 1                         | 1           | 1                         | 1           | -1       | 1           | 1           | 1           | 1                            | 1           | 0               | -1          |
| Soil quality (low)                                          | 0                       | 1           | -1            | 1           | 1                         | 1           | 1                         | 1           | -1       | 1           | 1           | 1           | 1                            | 1           | 0               | 1           |
| Soil quality (high)                                         | 1                       | -1          | 0             | -1          | 1                         | -2          | 1                         | -2          | -1       | -2          | 0           | -2          | 0                            | -1          | 0               | -1          |
| Within nature conservation area (yes)                       | 1                       | 1           | -2            | -2          | 1                         | 1           | 1                         | 1           | -2       | 1           | 1           | 1           | 1                            | 1           | 1               | -1          |
| Within Natura 2000 networks (yes)                           | 1                       | 0           | -2            | -1          | 1                         | 0           | 1                         | 0           | -2       | 0           | 1           | 0           | 1                            | 0           | 1               | 0           |
| Risk for Soil erosion (yes)                                 | 0                       | 0           | 0             | 0           | 0                         | 0           | 0                         | 0           | 0        | 0           | 0           | 0           | 0                            | 0           | 1               | 1           |
| Ground- and backwater up to 1 m depth (yes)                 | -2                      | 1           | -2            | 1           | 1                         | 1           | 1                         | 1           | -2       | 1           | 1           | 1           | 1                            | 1           | 0               | 1           |

| Assessment of the option*                          |
|----------------------------------------------------|
| desirable                                          |
| neutral                                            |
| less desirable                                     |
| not suitable                                       |
| * In relation to the absence of the expression (0) |

|                               |
|-------------------------------|
| Initial condition arable land |
| Initial condition grassland   |
